# Supplementary material
Source: HighWire-hosted journal article supplement (https://www.rcpjournals.org/highwire/filestream/13960/field_highwire_adjunct_files/2/Brown_supplementary_material_S3.pdf)
Supplement: Brown_supplementary_material_S3.pdf [file Brown_supplementary_material_S3.pdf]

## Formal and Informal Teaching Opportunities

### (Medical student) CA attendance to formal teaching\*

|           |    |
|-----------|----|
| Always    | 6  |
| Often     | 5  |
| Sometimes | 11 |
| Rarely    | 10 |
| Never     | 8  |

### CA perceptions regarding usefulness of formal teaching

|                  |    |
|------------------|----|
| Always           | 9  |
| Often            | 12 |
| Sometimes        | 5  |
| Rarely           | 5  |
| Never            | 5  |
| Did not disclose | 4  |

### Number of clinicians able to offer informal teaching on certain domains

|                                                                          |    |
|--------------------------------------------------------------------------|----|
| Practical procedures e.g. venepuncture, cannulation, catheters, NG tubes | 47 |
| History taking                                                           | 35 |
| Physical examinations                                                    | 34 |
| Differential diagnoses for a symptom / presenting complaint              | 41 |
| Common medical and surgical conditions                                   | 45 |
| Discussing interpretations of investigations e.g. bloods, scans          | 46 |

\*n = 40
